# Supplementary material for: Modelling rapid mass movements using the shallow water equations in Cartesian coordinates
Source: Copernicus journal article supplement (doi:10.5194/nhess-15-671-2015), 2015-03-30
Supplement: Supplementary file 1 [file nhess-15-671-2015-supplement.zip]

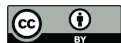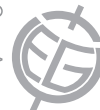

## *Supplement of*

# **Modeling rapid mass movements using the shallow water equations**

**S. Hergarten and J. Robl**

*Correspondence to:* J. Robl ([joerg.robl@sbg.ac.at](mailto:joerg.robl@sbg.ac.at))

- Supplement-Cover-Letter.pdf
- SUPP
  - GERRIS\_PARAMETER\_FILE
    - \* RapidMassMovement.gfs
  - MOVIES
    - \* Concave\_SharpTransition.avi
    - \* Concave\_SmoothTransition.avi
    - \* Convex\_SharpTransition.avi
    - \* Convex\_SmoothTransition.avi
    - \* GeneralTopography\_FlowDepth.avi
